RESEARCH ARTICLE

# Incidence and risk factors for phaeochromocytoma diagnosis in dogs under primary veterinary care in the UK

Martin Litviakov<sup>1</sup>, Dan G. O'Neill<sup>2</sup>, Dave C. Brodbelt<sup>2</sup>, Sara Galac<sup>3</sup>, Floryne O. Buishand<sup>1\*</sup>

**1** Department of Clinical Science and Services, Royal Veterinary College, Hatfield, United Kingdom, **2** Department of Pathobiology and Population Sciences, Royal Veterinary College, Hatfield, United Kingdom, **3** Department of Clinical Sciences, Faculty of Veterinary Medicine, Utrecht University, Utrecht, The Netherlands

\* [fbuishand@rvc.ac.uk](mailto:fbuishand@rvc.ac.uk)

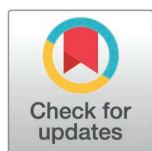

## OPEN ACCESS

**Citation:** Litviakov M, O'Neill DG, Brodbelt DC, Galac S, Buishand FO (2025) Incidence and risk factors for phaeochromocytoma diagnosis in dogs under primary veterinary care in the UK. PLoS One 20(10): e0332811. <https://doi.org/10.1371/journal.pone.0332811>

**Editor:** Laura Patterson Rosa, Long Island University - CW Post Campus: Long Island University, UNITED STATES OF AMERICA

**Received:** June 6, 2025

**Accepted:** September 4, 2025

**Published:** October 15, 2025

**Copyright:** © 2025 Litviakov et al. This is an open access article distributed under the terms of the [Creative Commons Attribution License](https://creativecommons.org/licenses/by/4.0/), which permits unrestricted use, distribution, and reproduction in any medium, provided the original author and source are credited.

**Data availability statement:** The datasets generated during the current study are available at Figshare: [dx.doi.org/10.6084/m9.figshare.29064563](https://dx.doi.org/10.6084/m9.figshare.29064563).

**Funding:** This study was supported at the RVC by internal Launchpad funding (FOB) and an

## Abstract

Phaeochromocytoma (PCC) is a tumour arising from the adrenal gland in dogs that can be challenging to diagnose. This study aimed to describe the incidence risk, breed predispositions and other demographic risk factors associated with the diagnosis PCC in dogs receiving primary veterinary care in the UK. All anonymised VetCompass Programme electronic health records from dogs receiving primary veterinary care in the UK during 2019 were included. Demographic risk factor analysis used multivariable logistic regression modelling. Out of a study population of 2,250,741 dogs, 92 were confirmed as PCC cases at any time point. The estimated 2019 incidence risk for PCC diagnosis was 1 per 100,000 dogs. The Soft-Coated Wheaten Terrier, German Pointer and Miniature Schnauzer showed significant breed predispositions for the diagnosis of PCC compared with crossbred dogs. Terrier breeds and breeds predisposed to other endocrine tumours were found to have increased odds of being diagnosed with PCC. Furthermore, neutered males and dogs aged between 9 and under 15 years were also associated with increased odds of PCC diagnosis. This study is the first to describe the epidemiology of PCC in dogs receiving primary veterinary care, providing new information concerning demographic risk factors and helping to improve clinical recognition of PCC for veterinary clinicians. Moreover, results from this study facilitate further research in the possible links of canine PCC with other canine endocrine tumours and the existence of concurrent endocrine neoplasia in dogs. Additionally, the results allow researchers to more robustly define useful PCC study populations for future comparative oncology studies.

award from the Kennel Club Charitable Trust and Agria Pet Insurance. Neither the Kennel Club Charitable Trust, Agria Pet Insurance nor the Kennel Club had any input in the design of the study, the collection, analysis and interpretation of data or in writing the manuscript.

**Competing interests:** The authors have declared that no competing interests exist.

## Introduction

Phaeochromocytoma (PCC) is a neuroendocrine tumour described in several species, sharing many similarities between dogs and humans [1,2]. PCC arises from the chromaffin cells which are responsible for producing and storing catecholamines in the adrenal medulla. These tumours can cause unpredictable episodic over-production of catecholamines such as epinephrine and norepinephrine, leading to non-specific clinical signs such as hypertension, tachycardia, weakness and abdominal pain in dogs, with anxiety, headaches and feelings of panic also being common in humans [3–8]. Human and canine PCC show similar genomic alterations, clinical signs, metastatic frequency and share similar treatment approaches, positioning dogs as a potentially more translationally relevant model than rodents [2,9–11]. Rodent models are constrained by key genomic differences in tumour suppression pathways, particularly involving the succinate dehydrogenase subunit B/D (*SDHB/D*) genes, and require artificial tumour induction, whereas PCC occurs spontaneously in dogs [9,12–16].

PCC is an uncommon clinical diagnosis, with the reported annual incidence in humans ranging from 1.9 to 4.6 cases per million per year [1,17–19]. However, a relatively higher prevalence of PCC in autopsy studies of 0.05% suggests that PCC could be heavily under-diagnosed in humans and result in premature mortality [8,20,21]. Clinical diagnosis of PCC is also considered rare in dogs although to the authors' knowledge the incidence of canine PCC has not yet been reported [5,6]. However, similarly to the human disease, it is likely that canine PCC is also substantially under-diagnosed because of its non-specific clinical signs that can commonly occur in other cardiovascular, neurological or endocrine diseases. Moreover, formal diagnosis of PCC can be challenging in primary care veterinary practice as the identification of an adrenal mass requires abdominal ultrasonography with a skilled operator, or access to advanced imaging modalities such as computed tomography (CT). It is not uncommon for PCC to be diagnosed incidentally when an adrenal mass is visualised whilst assessing the abdomen for another problem [22,23]. Biochemical testing and measurement of plasma or urine free normetanephrine concentrations are also used in both dogs and humans as means of identifying PCC, but have only been introduced to veterinary medicine over the past 10–15 years and made readily commercially available even more recently [24–28]. However, definitive diagnosis of PCC relies on histopathology and immunohistochemistry [2,29,30].

In humans, up to 24% of PCC are related to hereditary tumour syndromes including Multiple Endocrine Neoplasia type 2 (MEN2), Multiple Endocrine Neoplasia type 3 (MEN3), von-Hippel-Lindau syndrome, neurofibromatosis type 1 and PCC-paraganglioma (PGL) syndrome, which implies that genetic testing for these syndromes should be routine for human PCC patients as they may be predisposed to the occurrence of neoplasia in multiple other endocrine organs [31,32]. However, the veterinary literature is quite limited regarding the existence of equivalent hereditary tumour syndromes in dogs [16,33,34].

Case series and case reports constitute most of the current veterinary literature on canine PCC, with most case series counting fewer than 60 dogs and mainly

focusing on the clinical, biochemical, imaging, treatment and pathologic findings of the disease [5,6,35–38]. These case series have not suggested any sex or breed predispositions [5,6]. The reported mean age and median bodyweight at time of diagnosis being 10–12 years and 17 kg respectively, suggesting that medium-sized middle-aged to older dogs are the most represented population [6,11].

Over the last ten years, veterinary epidemiological studies of the frequency and risk factors for neoplasia in dogs and cats are increasingly being published using large primary care datasets, thus providing epidemiological knowledge that could not be obtained from past case series. This ‘big data approach’ has allowed veterinary epidemiological studies to match the study designs and population numbers of human epidemiological studies, which are essential to improving the understanding of rare diseases [39–41]. A major player in the improvement of veterinary epidemiological outputs has been the VetCompass Programme which shares anonymised electronic health records (EHRs) from over 30% of all UK practices and includes over 20 million animals [42]. VetCompass has already supported several publications in veterinary oncological epidemiology, determining the incidence and risk factors for canine insulinoma, osteosarcoma and mammary tumours amongst others [43–45]. With this background, the present study aimed to use VetCompass data to report the annual (2019) prevalence and incidence risk of PCC, as well as demographic risk factors, with an emphasis on breed associations, for dogs under primary veterinary care in the UK. A better understanding of PCC epidemiology not only equips veterinary clinicians to recognise and diagnose PCC earlier, but it could also strengthen the dog’s value as a spontaneous translational model for human PCC research.

## Materials and methods

This study utilised data from 2,250,741 dogs under primary veterinary care in 2019, collected from veterinary practices across the UK participating in the VetCompass Programme, which compiles anonymised EHRs for epidemiological research [42]. Dogs were considered under veterinary care if they had at least one EHR entry (clinical note, treatment, or bodyweight record) in 2019. Available data fields included a unique animal ID, species, breed, date of birth, sex, neuter status, as well as clinical notes, treatment records, and bodyweight entries, each with corresponding dates. For this study, cohort EHR data were reviewed up to August 31, 2024 for dogs with at least one EHR recorded in 2019.

A retrospective cohort study design was employed to estimate the available-EHR prevalence (i.e., cases meeting the PCC case definition up to August 31, 2024), the annual prevalence in 2019, and the incidence risk for PCC diagnosis in 2019. The study also examined the relationship between demographic risk factors and the likelihood of a PCC diagnosis. And initial screening indicated a crude prevalence of PCC at 0.01%, and based on this, a sample size of at least 150,747 dogs was calculated to estimate this frequency with a 0.005% margin of error at 95% confidence, assuming an 8-million-dog population in the UK [46]. Ethical approval was granted by the RVC Social Science Research Ethical Review Board (reference: SR2018–1652).

A dog was classified as a PCC case if it met at least one of the following criteria:

1. Evidence of a recorded final diagnosis of PCC in available EHRs.
2. Histopathological confirmation of PCC in the available clinical records.
3. Evidence in all available clinical records of a plasma free normetanephrine concentration >3.6 nmol/L, or metanephrine concentration >2.5 nmol/L, or urinary normetanephrine:creatinine >300 nmol/L, combined with the demonstration of an adrenal mass on ultrasound or computed tomography.
4. At least one recorded prescription of phenoxybenzamine, combined with the demonstration of an adrenal mass or caval thrombus on ultrasound or CT.

Dogs that were initially diagnosed with PCC but where this diagnosis was later ruled out were excluded. Case-finding involved a two-step process. Candidate PCC cases were initially identified through a search of the clinical notes using

specific search terms: 'phaeo\*', 'feoc\*', 'pheoc\*', 'normetane\*', 'metane\*', 'phenox\*', 'adrenalect\*', 'caval throm\*', and 'caval inv\*' and the treatment fields using the search terms: 'phenox\*' and 'adrenalect\*'. Secondly, EHRs of all candidate cases were manually reviewed to determine eligibility for inclusion. A random sample of 500,000 non-PCC cases out of dogs not identified as candidate cases was used as controls in risk factor analysis.

Data cleaning was performed in Excel (Microsoft Office Excel 2016), and statistical analyses were conducted using SPSS® Statistics version 30 (IBM®). Breed details recorded by the participating practices underwent cleaning and were mapped to a VetCompass breed list, which was based and expanded upon from the VeNom Coding breed list, encompassing both acknowledged purebred breeds as well as designer breed terms [47]. A breed purity variable (termed *Purebred*) was used to classify dogs as follows: recognised breeds were labelled 'purebred', dogs with contrived names combining two or more purebred terms were categorised as 'designer' crossbreeds (intentionally bred crosses) and dogs recorded as mixed breed without a specific name were classified as 'crossbreed' [48]. A *Breed* variable included individual pure breeds and designer hybrids with at least two PCC cases, while all other breeds were grouped together, along with a separate grouping for general crossbreed dogs. This classification aimed to enhance statistical power of the analyses for individual breeds [49]. A *terrier* variable classified breeds as 'terrier' or 'non-terrier' based on a combined grouping from the Kennel Club and VeNom Coding Group [45,47,48]. Variables of breeds predisposed for various types of endocrine cancer were used as previously described by Kraai *et al.* (2025) [45].

Sex and neuter status were combined into one variable for the risk factor analysis based on the final EHR record. Median adult bodyweight was calculated using all bodyweights recorded after 18 months of age for each dog and categorised as: < 10.0 kg, 10.0 to < 20.0 kg, 20.0 to < 30.0 kg and ≥ 30.0 kg. Age at first diagnosis was based on date of birth and date of first PCC diagnosis. Age of the non-PCC cases was defined at December 31, 2019. Age categories were classified into: < 6 years, 6 – < 9 years, 9 – < 12 years, 12 – < 15 years, ≥ 15 years and unrecorded. Normally distributed continuous variables were summarised as mean (standard deviation [SD]) while non-normally distributed data were presented as median (interquartile range [IQR] and range).

The available-EHR prevalence of PCC diagnosis was calculated by dividing the total number of diagnosed cases at any time up to August 31, 2024, by the total number of dogs in the study. The one-year period prevalence for 2019 included all cases diagnosed up to December 31, 2019, divided by the same denominator population. Annual incidence risk for 2019 was defined as the number of newly diagnosed cases that year divided by the denominator population. Breed available-EHR prevalence was calculated similarly, by dividing the number of PCC cases of a breed within all available EHRs by the number of dogs of that breed within the denominator population. Confidence intervals (CIs) were calculated using standard errors, based on an approximation to the binomial distribution.

Risk factor analysis included all cases diagnosed up to August 31, 2024 (i.e., available-EHR risk) to maximise statistical power. Binary logistic regression modelling was used to assess univariable associations between potential risk factors (sex/neuter status, breed, purebred status, median adult bodyweight, age, median adult bodyweight in relation to the median for the sex/breed, terrier breed status, and known breed predisposition to other endocrine cancers) and the outcome of having a PCC diagnosis at any point up to August 31, 2024 among dogs under primary veterinary care in 2019. Risk factors with an inflated cut-off *P*-value < 0.2 in univariable screening analyses were included in multivariable analysis, following the standardised methodology of previously published VetCompass studies [43–45,50,51]. This purposeful selection of covariates with an inflated cut-off *P*-value < 0.2 in univariable analysis has been demonstrated to be superior to the use of more traditional *P*-value cut-off points such as 0.05 or 0.1, as those lower cut-offs can fail in identifying variables known to be important [52]. Median adult bodyweight was considered a defining characteristic of individual breeds and was therefore excluded from initial breed-focused multivariable modelling [48]. Other variables directly derived from the *Breed* variable (e.g., *Terrier*, *Breed predisposed for one of multiple types of endocrine cancer*) were similarly not considered in initial breed-focused multivariable modelling, but individually replaced the *Breed* variable in the final breed-focused multivariable model to test their effects after taking account of the other variables in that model [53]. Model

fit and discriminatory performance of the final breed multivariable model were evaluated using the area under the receiver operating characteristic (ROC) curve and the Hosmer-Lemeshow test. Variables were retained in the final multivariable logistic regression model if they met the threshold for statistical significance ( $P < 0.05$ ).

## Results

### Demography

Among the study population of 2,250,741 dogs under primary veterinary care in 2019, 1,222 (0.05%) candidate PCC cases were identified. Following manual review, 92/1,222 (7.53%) candidates were confirmed as PCC cases that met the inclusion criteria at any time in the available EHRs up to August 31, 2024. The dates of first recorded PCC diagnoses for the 92 cases were between April 1, 2016 and August 31, 2024. The available-EHR prevalence for PCC diagnosis was 4 per 100,000 dogs. Of the 92 cases, 32 cases were diagnosed on or before December 31, 2019, corresponding to a 2019 annual prevalence of 1 per 100,000 dogs. Eighteen cases were newly diagnosed in 2019, yielding an annual (2019) incidence risk for PCC diagnosis of 1 per 100,000 dogs. Of breeds with  $\geq 2$  PCC cases, the breeds with the highest available-EHR prevalence were Soft-Coated Wheaten Terrier ( $n=2$ , 0.71%, 95% CI 0.09–2.57%), German Pointer ( $n=2$ , 0.09%, 95% CI 0.09–2.54%), Miniature Schnauzer ( $n=4$ , 0.09%, 95% CI 0.02–0.22%) and Yorkshire Terrier ( $n=6$ , 0.05%, 95% CI 0.02–0.11%) (Fig 1).

Of the 92 PCC cases diagnosed to August 31, 2024, 65 (70.7%) were male (with 75.4% neutered) and 27 (29.4%) were female (with 77.8% neutered). Age at first diagnosis was available for 76/92 (82.6%) dogs. The median age at first PCC diagnosis was 10.6 years (IQR 9.3–12.3, range 5.6–14.4). Median adult bodyweight was available for 82/92 (89.1%)

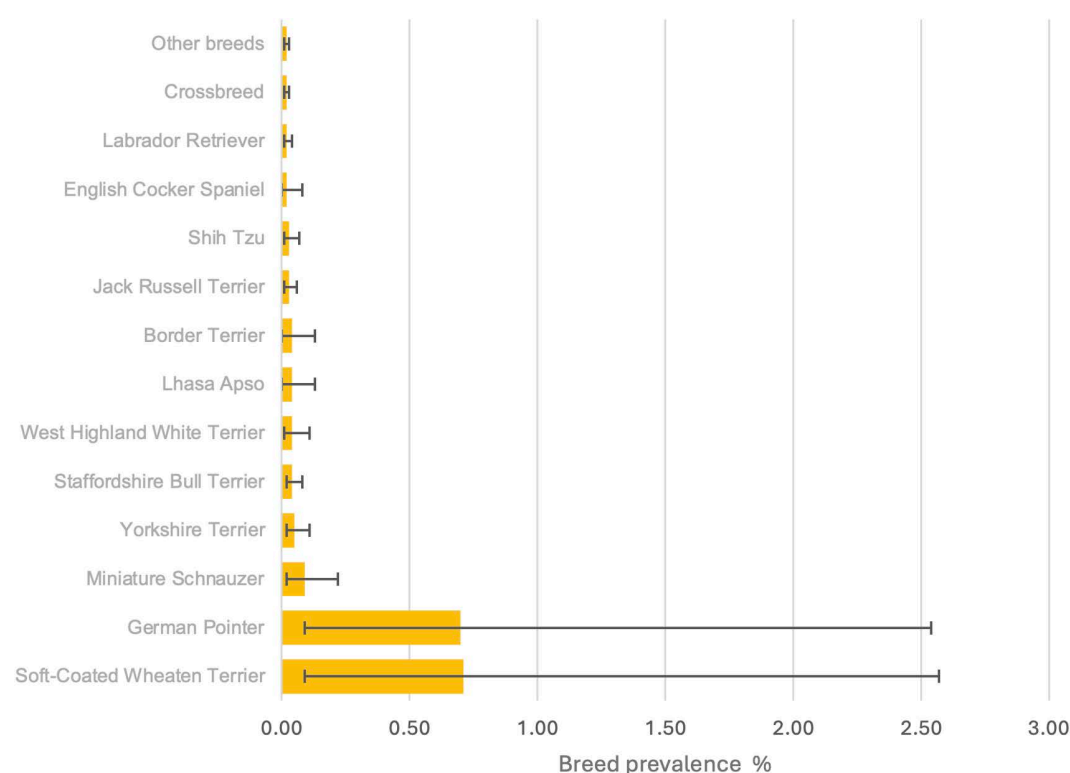

**Fig 1. Available-EHR breed prevalence of phaeochromocytoma diagnosis in dog breeds with  $\geq 2$  phaeochromocytoma cases ( $n=69$ ) under primary veterinary care at practices in the VetCompass Programme in the UK in 2019.** The error bars show the 95% confidence interval.

<https://doi.org/10.1371/journal.pone.0332811.g001>



cases. The median of the median adult bodyweight was 12.8 kg (IQR 9.1–23.3, range 4.6–68.9). The most frequently diagnosed breeds with PCC were crossbreed ( $n=22$ ), Staffordshire Bull Terrier ( $n=8$ ), and Jack Russell Terrier ( $n=7$ ) (Table 1).

Among the random sample of 500,000 non-PCC cases, 258,026 (51.6%) were male (with 43.0% neutered), 237,611 (47.5%) were female (with 44.6% neutered) and the sex was unrecorded in 4,363 cases (0.9%). The median age at December 31, 2019 was available for 496,135/500,000 (99.2%), with a median age of 5.2 years (IQR 2.2–9.0, range 0.0–24.8). The median adult bodyweight was available for 342,535/500,000 (68.5%) dogs, with a median of the median adult bodyweight of 13.7 kg (IQR 8.4–24.4, range 1.5–106.0). The most frequently represented breeds in the non-PCC cases group were crossbreed ( $n=119,096$ ), Labrador Retriever ( $n=34,325$ ), and Jack Russell Terrier ( $n=22,612$ ) (Table 1).

## Risk factor analysis

Univariable binary logistic regression identified 13 variables meeting the inflated cut-off ( $P<0.20$ ) of univariable screening for a liberal association with PCC diagnosis recorded at any time up to August 31, 2024: sex-neuter status, age, median adult body weight, breed, median adult bodyweight in relation to the median for the sex/breed, terrier breed status, breed predisposed for mammary gland cancer, breed predisposed for pituitary/cortisol-secreting adrenal cancer, breed predisposed for pituitary/cortisol-secreting adrenal cancer and/or insulinoma, breed predisposed for parathyroid and/or thyroid and/or pituitary/cortisol-secreting adrenal cancer, breed predisposed for parathyroid and/or thyroid and/or pituitary/cortisol-secreting adrenal cancer and/or insulinoma, breed predisposed for reproductive endocrine organ cancer and breed predisposed for one or multiple types of endocrine cancer (Tables 1 and 2).

The final breed-focused multivariable logistic regression model included three retained variables: breed, sex/neuter status and age (Table 3). The area under the ROC curve of the final breed-focused model was 0.867, indicating good discrimination (S1 Fig). The model also demonstrated no evidence of poor model fit (Hosmer-Lemeshow test statistic

**Table 1. Descriptive statistics and univariable logistic regression results evaluating breed as a risk factor for pheochromocytoma diagnosis in 92 dogs at any date in all available EHRs compared with a randomly selected control group of 500,000 dogs under UK primary veterinary care in 2019, as recorded in the VetCompass database.**

| Breed                       | Phaeochromocytoma cases, $n$ (%) | Non-pheochromocytoma cases, $n$ (%) | Odds ratio | 95% CI*     | Category $P$ -value | Variable $P$ -value |
|-----------------------------|----------------------------------|-------------------------------------|------------|-------------|---------------------|---------------------|
| Crossbreed                  | 22 (23.91)                       | 119,096 (23.82)                     | Ref**      |             |                     | <b>&lt;0.001</b>    |
| Soft-Coated Wheaten Terrier | 2 (2.17)                         | 281 (0.06)                          | 38.53      | 9.02–164.63 | <b>&lt;0.001</b>    |                     |
| German Pointer              | 2 (2.17)                         | 285 (0.06)                          | 37.99      | 8.89–162.31 | <b>&lt;0.001</b>    |                     |
| Miniature Schnauzer         | 4 (4.35)                         | 4,682 (0.94)                        | 4.63       | 1.59–13.43  | <b>0.005</b>        |                     |
| Yorkshire Terrier           | 6 (6.52)                         | 11,671 (2.33)                       | 2.78       | 1.13–6.87   | <b>0.026</b>        |                     |
| Staffordshire Bull Terrier  | 8 (8.70)                         | 20,746 (4.15)                       | 2.09       | 0.93–4.69   | 0.075               |                     |
| West Highland White Terrier | 3 (3.26)                         | 7,866 (1.57)                        | 2.07       | 0.62–6.90   | 0.239               |                     |
| Lhasa Apso                  | 2 (2.17)                         | 5,473 (1.10)                        | 1.98       | 0.47–8.42   | 0.356               |                     |
| Border Terrier              | 2 (2.17)                         | 5,535 (1.11)                        | 1.96       | 0.46–8.32   | 0.364               |                     |
| Jack Russell Terrier        | 7 (7.61)                         | 22,612 (4.52)                       | 1.68       | 0.72–3.92   | 0.234               |                     |
| Shih Tzu                    | 4 (4.35)                         | 15,028 (3.01)                       | 1.44       | 0.50–4.18   | 0.502               |                     |
| English Cocker Spaniel      | 2 (2.17)                         | 9,483 (1.90)                        | 1.14       | 0.67–4.86   | 0.858               |                     |
| Labrador Retriever          | 5 (5.43)                         | 34,235 (6.85)                       | 0.79       | 0.30–2.09   | 0.635               |                     |
| Other breeds                | 23 (25.00)                       | 243,007 (48.60)                     | 0.51       | 0.29–0.92   | <b>0.025</b>        |                     |
| Total                       | 92 (100.00)                      | 500,000 (100.00)                    |            |             |                     |                     |

Column percentages are presented in brackets. \*CI, confidence interval. \*\*Ref, reference category used as the baseline for comparison with other groups. Statistically significant results ( $P<0.05$ ) are highlighted in bold.

<https://doi.org/10.1371/journal.pone.0332811.t001>

**Table 2. Descriptive statistics and univariable logistic regression results evaluating demographic risk factors for phaeochromocytoma diagnosis in 92 dogs at any date in all available EHRs compared with a randomly selected control group of 500,000 dogs under UK primary veterinary care in 2019, as recorded in the VetCompass database.**

| Variable                                                                                                     | Phaeochromocytoma cases, <i>n</i> (%) | Non-phaeochromocytoma cases, <i>n</i> (%) | Odds ratio | 95% CI*    | Category <i>P</i> -value | Variable <i>P</i> -value |
|--------------------------------------------------------------------------------------------------------------|---------------------------------------|-------------------------------------------|------------|------------|--------------------------|--------------------------|
| Sex-neuter                                                                                                   |                                       |                                           |            |            |                          | <b>&lt;0.001</b>         |
| Female entire                                                                                                | 6 (6.52)                              | 131,611 (26.32)                           | Ref**      |            |                          |                          |
| Female neutered                                                                                              | 21 (22.83)                            | 106,000 (21.20)                           | 4.35       | 1.75-10.77 | <b>0.002</b>             |                          |
| Male entire                                                                                                  | 49 (53.26)                            | 147,198 (29.44)                           | 2.38       | 0.93-6.09  | 0.070                    |                          |
| Male neutered                                                                                                | 16 (17.39)                            | 110,828 (22.17)                           | 9.70       | 4.15-22.64 | <b>&lt;0.001</b>         |                          |
| Unrecorded                                                                                                   | 0 (0)                                 | 4,363 (0.87)                              | 0          | 0          | 0.985                    |                          |
| Age at time of diagnosis (phaeochromocytoma cases) and age at December 31 2019 (non-phaeochromocytoma cases) |                                       |                                           |            |            |                          | <b>&lt;0.001</b>         |
| 0 – < 6                                                                                                      | 1 (1.09)                              | 276,619 (55.32)                           | 0.03       | 0.00-0.19  | <b>&lt;0.001</b>         |                          |
| 6 – < 9                                                                                                      | 14 (15.22)                            | 96,646 (19.32)                            | Ref        |            |                          |                          |
| 9 – < 12                                                                                                     | 46 (50.00)                            | 71,440 (14.29)                            | 4.45       | 2.44-8.09  | <b>&lt;0.001</b>         |                          |
| 12 – < 15                                                                                                    | 29 (31.52)                            | 40,442 (8.09)                             | 4.95       | 2.62-9.37  | <b>&lt;0.001</b>         |                          |
| ≥15                                                                                                          | 1 (1.09)                              | 10,987 (2.20)                             | 0.63       | 0.08-4.78  | 0.653                    |                          |
| Unrecorded                                                                                                   | 1 (1.09)                              | 3,866 (0.77)                              | 1.79       | 0.24-13.58 | 0.575                    |                          |
| Median adult bodyweight                                                                                      |                                       |                                           |            |            |                          | <b>&lt;0.001</b>         |
| <10 kg                                                                                                       | 27 (29.35)                            | 118,594 (23.72)                           | 1.65       | 0.72-3.80  | 0.236                    |                          |
| 10 – < 20 kg                                                                                                 | 28 (30.43)                            | 106,103 (21.22)                           | 1.92       | 0.84-4.39  | 0.124                    |                          |
| 20 – < 30 kg                                                                                                 | 19 (20.65)                            | 66,991 (13.40)                            | 2.06       | 0.87-4.90  | 0.102                    |                          |
| ≥30 kg                                                                                                       | 7 (7.61)                              | 50,847 (10.17)                            | Ref        |            |                          |                          |
| Unrecorded                                                                                                   | 11 (11.96)                            | 157,465 (31.49)                           | 0.51       | 0.20-1.31  | 0.161                    |                          |
| Purebred                                                                                                     |                                       |                                           |            |            |                          | 0.565                    |
| Crossbreed                                                                                                   | 22 (23.91)                            | 119,096 (23.82)                           | Ref        |            |                          |                          |
| Designer                                                                                                     | 4 (4.35)                              | 33,201 (6.64)                             | 0.65       | 0.23-1.89  | 0.432                    |                          |
| Purebred                                                                                                     | 66 (71.74)                            | 344,711 (68.94)                           | 1.04       | 0.64-1.68  | 0.884                    |                          |
| Unrecorded                                                                                                   | 0 (0.0)                               | 2,992 (0.60)                              | 0          | 0          | 0.986                    |                          |
| Median adult bodyweight in relation to the median for the sex/breed                                          |                                       |                                           |            |            |                          | <b>&lt;0.001</b>         |
| At or below median adult bodyweight for the sex/breed                                                        | 33 (35.87)                            | 171,519 (34.30)                           | Ref        |            |                          |                          |
| Above median adult bodyweight for the sex/breed                                                              | 48 (52.17)                            | 169,624 (33.92)                           | 1.47       | 0.94-2.29  | 0.088                    |                          |
| Unrecorded                                                                                                   | 11 (11.96)                            | 158,857 (31.77)                           | 0.36       | 0.18-0.71  | <b>&lt;0.001</b>         |                          |
| Terrier                                                                                                      |                                       |                                           |            |            |                          | <b>&lt;0.001</b>         |
| Non-terrier                                                                                                  | 66 (71.74)                            | 435,007 (87.00)                           | Ref        |            |                          |                          |
| Terrier                                                                                                      | 26 (28.26)                            | 64,993 (13.00)                            | 2.64       | 1.68-4.15  | <b>&lt;0.001</b>         |                          |
| Breed predisposed for mammary gland cancer                                                                   |                                       |                                           |            |            |                          | <b>0.019</b>             |
| Not predisposed                                                                                              | 54 (58.70)                            | 349,891 (69.98)                           | Ref        |            |                          |                          |
| Predisposed                                                                                                  | 38 (41.30)                            | 150,109 (30.02)                           | 1.64       | 1.08-2.48  | <b>0.019</b>             |                          |
| Breed predisposed for parathyroid cancer                                                                     |                                       |                                           |            |            |                          | 0.554                    |
| Not predisposed                                                                                              | 86 (93.48)                            | 458,892 (91.78)                           | Ref        |            |                          |                          |
| Predisposed                                                                                                  | 6 (6.52)                              | 41,108 (8.22)                             | 0.78       | 0.34-1.78  | 0.554                    |                          |
| Breed predisposed for thyroid cancer                                                                         |                                       |                                           |            |            |                          | 0.634                    |
| Not predisposed                                                                                              | 90 (97.83)                            | 484,849 (96.97)                           | Ref        |            |                          |                          |
| Predisposed                                                                                                  | 2 (2.17)                              | 15,151 (3.03)                             | 0.71       | 0.18-2.89  | 0.634                    |                          |

(Continued)

**Table 2.** (Continued)

| Variable                                                                                                              | Phaeochromocytoma cases, <i>n</i> (%) | Non-phaeochromocytoma cases, <i>n</i> (%) | Odds ratio | 95% CI*   | Category <i>P</i> -value | Variable <i>P</i> -value |
|-----------------------------------------------------------------------------------------------------------------------|---------------------------------------|-------------------------------------------|------------|-----------|--------------------------|--------------------------|
| Breed predisposed for insulinoma                                                                                      |                                       |                                           |            |           |                          | 0.416                    |
| Not predisposed                                                                                                       | 85 (92.39)                            | 471,784 (94.36)                           | Ref        |           |                          |                          |
| Predisposed                                                                                                           | 7 (7.61)                              | 28,216 (5.64)                             | 1.38       | 0.64-2.98 | 0.416                    |                          |
| Breed predisposed for pituitary/cortisol-secreting adrenal cancer                                                     |                                       |                                           |            |           |                          | <b>&lt;0.001</b>         |
| Not predisposed                                                                                                       | 56 (60.87)                            | 387,621 (77.52)                           | Ref        |           |                          |                          |
| Predisposed                                                                                                           | 36 (39.13)                            | 112,379 (22.48)                           | 2.22       | 1.46-3.37 | <b>&lt;0.001</b>         |                          |
| Breed predisposed for parathyroid and/or thyroid cancer                                                               |                                       |                                           |            |           |                          | 0.678                    |
| Not predisposed                                                                                                       | 84 (91.30)                            | 449,812 (89.96)                           | Ref        |           |                          |                          |
| Predisposed                                                                                                           | 8 (8.70)                              | 50,188 (10.04)                            | 1.17       | 0.56-2.41 | 0.678                    |                          |
| Breed predisposed for pituitary/cortisol-secreting adrenal cancer and/or insulinoma                                   |                                       |                                           |            |           |                          | <b>&lt;0.001</b>         |
| Not predisposed                                                                                                       | 50 (54.35)                            | 363,316 (72.66)                           | Ref        |           |                          |                          |
| Predisposed                                                                                                           | 42 (45.65)                            | 136,684 (27.34)                           | 2.23       | 1.48-3.36 | <b>&lt;0.001</b>         |                          |
| Breed predisposed for parathyroid and/or thyroid cancer and/or insulinoma                                             |                                       |                                           |            |           |                          | 0.436                    |
| Not predisposed                                                                                                       | 78 (84.78)                            | 437,174 (87.43)                           | Ref        |           |                          |                          |
| Predisposed                                                                                                           | 14 (15.22)                            | 62,826 (12.57)                            | 1.25       | 0.71-2.22 | 0.436                    |                          |
| Breed predisposed for parathyroid and/or thyroid and/or pituitary/cortisol-secreting adrenal cancer                   |                                       |                                           |            |           |                          | <b>0.008</b>             |
| Not predisposed                                                                                                       | 55 (59.78)                            | 361,845 (72.37)                           | Ref        |           |                          |                          |
| Predisposed                                                                                                           | 37 (40.22)                            | 138,155 (27.63)                           | 1.76       | 1.16-2.67 | <b>0.008</b>             |                          |
| Breed predisposed for parathyroid and/or thyroid and/or pituitary/cortisol-secreting adrenal cancer and/or insulinoma |                                       |                                           |            |           |                          | <b>&lt;0.001</b>         |
| Not predisposed                                                                                                       | 49 (53.26)                            | 349,207 (69.84)                           | Ref        |           |                          |                          |
| Predisposed                                                                                                           | 43 (46.74)                            | 150,793 (30.16)                           | 2.03       | 1.35-3.06 | <b>&lt;0.001</b>         |                          |
| Breed predisposed for reproductive endocrine organ cancer***                                                          |                                       |                                           |            |           |                          | 0.093                    |
| Not predisposed                                                                                                       | 52 (56.52)                            | 324,602 (64.92)                           | Ref        |           |                          |                          |
| Predisposed                                                                                                           | 40 (43.48)                            | 175,398 (35.08)                           | 1.42       | 0.94-2.15 | 0.093                    |                          |
| Breed predisposed for testicular and/or ovarian cancer                                                                |                                       |                                           |            |           |                          | 0.226                    |
| Not predisposed                                                                                                       | 86 (93.48)                            | 447,889 (89.58)                           | Ref        |           |                          |                          |
| Predisposed                                                                                                           | 6 (6.52)                              | 52,111 (10.42)                            | 0.60       | 0.26-1.37 | 0.226                    |                          |
| Breed predisposed for one or multiple types of endocrine cancer                                                       |                                       |                                           |            |           |                          | <b>0.006</b>             |
| Not predisposed                                                                                                       | 39 (42.39)                            | 283,249 (56.65)                           | Ref        |           |                          |                          |
| Predisposed                                                                                                           | 53 (57.61)                            | 216,751 (43.35)                           | 1.78       | 1.17-2.69 | <b>0.006</b>             |                          |

Column percentages are presented in brackets. \*CI, confidence interval. \*\*Ref, reference category used as the baseline for comparison with other groups. \*\*\*Reproductive endocrine organs include mammary glands, testicles and ovaries. Statistically significant results ( $P < 0.05$ ) are highlighted in bold.

<https://doi.org/10.1371/journal.pone.0332811.t002>



**Table 3. Results from the final breed-focused multivariable logistic regression model identifying risk factors associated with pheochromocytoma diagnosis in dogs under UK primary veterinary care in 2019, as recorded in the VetCompass database.**

| Variable                    | Odds ratio | 95% CI*     | Category P-value | Variable P-value |
|-----------------------------|------------|-------------|------------------|------------------|
| Breed                       |            |             |                  | <b>&lt;0.001</b> |
| Crossbreed                  | Ref**      |             |                  |                  |
| Soft-Coated Wheaten Terrier | 30.93      | 7.18-133.22 | <b>&lt;0.001</b> |                  |
| German Pointer              | 11.01      | 3.28-36.94  | <b>&lt;0.001</b> |                  |
| Miniature Schnauzer         | 4.69       | 1.61-13.63  | <b>0.005</b>     |                  |
| Yorkshire Terrier           | 2.26       | 0.92-5.59   | 0.077            |                  |
| Staffordshire Bull Terrier  | 1.62       | 0.72-3.66   | 0.242            |                  |
| West Highland White Terrier | 1.17       | 0.35-3.92   | 0.799            |                  |
| Lhasa Apso                  | 1.61       | 0.38-6.83   | 0.522            |                  |
| Border Terrier              | 1.33       | 0.31-5.66   | 0.702            |                  |
| Jack Russell Terrier        | 1.09       | 0.46-2.55   | 0.852            |                  |
| Shih Tzu                    | 1.46       | 0.50-4.23   | 0.490            |                  |
| English Cocker Spaniel      | 0.78       | 0.23-2.60   | 0.683            |                  |
| Labrador Retriever          | 0.67       | 0.25-1.76   | 0.414            |                  |
| Other breeds                | 0.61       | 0.34-1.11   | 0.108            |                  |
| Sex-neuter                  |            |             |                  | <b>&lt;0.001</b> |
| Female entire               | 0.47       | 0.18-1.21   | 0.117            |                  |
| Female neutered             | 0.87       | 0.45-1.66   | 0.664            |                  |
| Male entire                 | Ref        |             |                  |                  |
| Male neutered               | 2.15       | 1.22-3.79   | <b>0.009</b>     |                  |
| Unrecorded                  | 0          | 0           | 0.983            |                  |
| Age                         |            |             |                  | <b>&lt;0.001</b> |
| 0 – < 6                     | 0.07       | 0.02-0.22   | <b>&lt;0.001</b> |                  |
| 6 – < 9                     | Ref        |             |                  |                  |
| 9 – < 12                    | 2.40       | 1.43-4.05   | <b>&lt;0.001</b> |                  |
| 12 – < 15                   | 2.42       | 1.34-4.35   | <b>0.003</b>     |                  |
| 15+                         | 1.53       | 0.52-4.47   | 0.437            |                  |
| Unrecorded                  | 0          | 0           | <b>0.985</b>     |                  |

\*CI, confidence interval. \*\*Ref, reference category used as the baseline for comparison with other groups. Statistically significant results ( $P < 0.05$ ) are highlighted in bold.

<https://doi.org/10.1371/journal.pone.0332811.t003>

$P = 0.576$ ). The Soft-Coated Wheaten Terrier, German Pointer and Miniature Schnauzer showed significant breed predispositions for the diagnosis of PCC. Higher odds of PCC diagnosis were found in neutered male dogs compared to entire male dogs and in dogs aged between 9 – < 12 years and 12 – < 15 years compared to dogs aged between 6 – < 9 years. Dogs aged between 0 – < 6 years had lower odds of PCC diagnosis compared to dogs aged between 6 – < 9 years (Table 3).

As outlined in the methods, variables derived from or correlated with breed were assessed multivariably by individually substituting them for the *breed* variable in the final breed-focused model. Following this process, nine additional variables were found to be significantly associated with PCC diagnosis: median adult bodyweight, terrier breed status, breed predisposed for mammary gland cancer, breed predisposed for pituitary/cortisol-secreting cancer, breed predisposed for pituitary/cortisol-secreting adrenal cancer and/or insulinoma, breed predisposed for parathyroid, thyroid and pituitary/adrenal cancer, breed predisposed for parathyroid and/or thyroid and/or pituitary/cortisol-secreting adrenal cancer and/

or insulinoma, breed predisposed for reproductive endocrine organ cancer and breed predisposed for one or multiple types of endocrine cancer (Table 4). Being a terrier breed showed increased odds for PCC diagnosis (OR 1.65, 95% CI 1.05–2.62) compared to not being a terrier breed, as well as being a breed predisposed for pituitary/cortisol-secreting cancer (OR 1.64, 95% CI 1.08–2.50) and being a breed predisposed for pituitary/cortisol-secreting adrenal cancer and/or insulinoma (OR 1.57, 95% CI 1.04–2.38) compared to not being a breed predisposed for either of these types of endocrine cancer.

## Discussion

This is the first published study to evaluate the frequency and risk factors for diagnosis of PCC in dogs under primary care veterinary practice in the UK. Novel important breed predispositions were identified, and other risk factors were also recognised which may assist veterinarians in primary care practice with increasing their clinical suspicion of PCC that hopefully promote better patient outcomes with this likely under-diagnosed disease. This study may also help strengthen the value of canine PCC as a model for the human disease and contribute to translational PCC studies.

The annual prevalence of 1 per 100,000 dogs, annual incidence risk of 1 per 100,000 dogs and available-EHR prevalence for the diagnosis of PCC of 4 per 100,000 dogs reported in this study provide new and valuable information on the

**Table 4. Results for nine breed-derived or breed-associated risk factors that, when substituted for breed in the final breed-focused multivariable logistic regression model, were significantly associated with pheochromocytoma diagnosis in dogs under UK primary veterinary care in 2019, as recorded in the VetCompass database.**

| Variable                                                                                                              | Odds ratio | 95% CI*   | Category P-value | Variable P-value |
|-----------------------------------------------------------------------------------------------------------------------|------------|-----------|------------------|------------------|
| Terrier                                                                                                               |            |           |                  | <b>0.031</b>     |
| Non-terrier                                                                                                           | Ref        |           |                  |                  |
| Terrier                                                                                                               | 1.65       | 1.05-2.62 | <b>0.031</b>     |                  |
| Breed predisposed for mammary gland cancer                                                                            |            |           |                  | 0.438            |
| Not predisposed                                                                                                       | Ref        |           |                  |                  |
| Predisposed                                                                                                           | 1.18       | 0.78-1.79 | 0.438            |                  |
| Breed predisposed for pituitary/cortisol-secreting adrenal cancer                                                     |            |           |                  |                  |
| Not predisposed                                                                                                       | Ref        |           |                  | <b>0.021</b>     |
| Predisposed                                                                                                           | 1.64       | 1.08-2.50 | <b>0.021</b>     |                  |
| Breed predisposed for pituitary/cortisol-secreting adrenal cancer and/or insulinoma                                   |            |           |                  |                  |
| Not predisposed                                                                                                       | Ref        |           |                  | <b>0.032</b>     |
| Predisposed                                                                                                           | 1.57       | 1.04-2.38 | <b>0.032</b>     |                  |
| Breed predisposed for parathyroid, thyroid and pituitary/adrenal cancer                                               |            |           |                  |                  |
| Not predisposed                                                                                                       | Ref        |           |                  | 0.213            |
| Predisposed                                                                                                           | 1.31       | 0.86-1.98 | 0.213            |                  |
| Breed predisposed for parathyroid and/or thyroid and/or pituitary/cortisol-secreting adrenal cancer and/or insulinoma |            |           |                  |                  |
| Not predisposed                                                                                                       | Ref        |           |                  | 0.075            |
| Predisposed                                                                                                           | 1.45       | 0.96-2.19 | 0.075            |                  |
| Breed predisposed for one or multiple types of endocrine cancer                                                       |            |           |                  |                  |
| Not predisposed                                                                                                       | Ref        |           |                  | 0.317            |
| Predisposed                                                                                                           | 1.24       | 0.82-1.87 | 0.317            |                  |

\*CI, confidence interval. \*\*Ref, reference category used as the baseline for comparison with other groups. Statistically significant results ( $P < 0.05$ ) are highlighted in bold.

<https://doi.org/10.1371/journal.pone.0332811.t004>

frequency of PCC diagnosis in dogs attending primary care veterinary practice in the UK. No comparison can be made with other studies as this is the first veterinary study to report these results. Human studies have reported incidence rates of PCC varying from 0.04 per 100,000 to 0.21 per 100,000 person-years, which is between four and a half times to twenty-five times lower than reported for dogs in this study [17–19,54]. However, a minor difference in epidemiological studies of PCC in humans is the inclusion of sympathetic paraganglioma (sPGL) in the reporting of incidence rates. sPGL are extra-adrenal tumours arising from the sympathetic paraganglia which are histologically identical to PCC, share the capacity to synthesise and release catecholamines and have previously been labelled as extra-adrenal PCC, although the World Health Organisation (WHO) consequently reserved the term PCC for intra-adrenal tumours, and even more recently the WHO has defined PCC as intra-adrenal paraganglioma originating from the chromaffin cells of the adrenal medulla [3,8,55–58]. Nevertheless, the majority (80–100%) of the described tumours in human epidemiological studies of PCC/sPGL are PCC, meaning that a strong parallel can still be drawn with this study that does not include sPGL, and suggesting that the incidence rate of intra-adrenal PCC in humans is likely slightly lower than the numbers previously quoted [19]. Additionally, PCC in dogs are clinically different to paraganglioma (PGL) as only PCC are known to overproduce catecholamines with a recent study demonstrating an equal split between adrenergic and noradrenergic phenotypes [59]. The veterinary literature on PGL is limited, therefore PGL were not included in this study [2,60,61].

There are several reasons why primary care veterinary clinicians may be under-diagnosing PCC in dogs. PCC clinical signs are non-specific to the disease and similar clinical signs can occur in many other cardiovascular, neurological or endocrine conditions [5,6,8]. However, clinical risk factors in humans can be used to increase the index of suspicion of PCC, including hyperadrenergic spells, treatment resistant hypertension, and incidentally discovered adrenal masses [62]. Clinical risk factors should also be further researched in dogs to determine if they can be employed alongside demographic risk factors to better identify patients with PCC both in a primary care and in a referral setting. Until recently biochemical assays for diagnosis of PCC such as urinary normetanephrine:creatinine have not been commercially available, which has likely led to fewer cases being detected prior to the start of commercial availability approximately 5 years ago, particularly in primary care practice [22,27,28]. Additionally, access to functional imaging modalities is more limited in primary care practice compared to referral veterinary hospitals [63,64]. In humans, PCC are often incidentally diagnosed during abdominal CT being undertaken for an unrelated condition, although functional imaging with Gallium-68 Dotanoc positron emission tomography computerised tomography (PET-CT) or Metaiodobenzylguanidine scintigraphy (MIBG) combined with single-photon emission computed tomography (SPECT) are preferred imaging modalities if PCC is suspected as they are highly sensitive and specific for the assessment of PCC and its corresponding metastases but are not available for use in veterinary medicine [65–68]. A study describing the epidemiology of human PCC/sPGL in the Netherlands from 1995–2015 found a significant increase of the age-standardised incidence rate coinciding with a reduction in tumour size at the time of initial diagnosis over that twenty-year period and concluded that this was most likely a result of changes in diagnostic practices leading to an earlier detection of these tumours [19]. It could therefore be hypothesised that incidence rates of canine PCC might also increase over time with improved access to veterinary referral hospitals particularly if this is combined with an increased availability of functional imaging, although financial costs for canine pet owners and shorter life expectancies of canines compared to humans may limit such advancements in the veterinary field. Nevertheless, the minimum four and a half times higher incidence rate of PCC in dogs compared to humans combined with a similar frequency of metastasis as well as common interspecies tumourigenic pathways and the possible association of PCC/PGL with chronic hypoxia in brachycephalic breeds as postulated by Holt *et al.* (2014) highlight the value of spontaneous canine PCC as a model for translational studies of human PCC [1,2,8–10,17–19].

Three breeds were identified with predisposition for PCC diagnosis through this study: Soft-Coated Wheaten Terrier, German Pointer and Miniature Schnauzer. All three breeds could be further characterised as being ultra-predisposed, having over four-times higher odds of PCC diagnosis compared to crossbreed dogs [69]. To date, no previous study has reported any breed predispositions for PCC diagnosis, although some previous studies have descriptively flagged the

Miniature Schnauzer amongst breeds represented by at least 2 dogs with PCC in their study populations [5,6,33,70–72]. To the authors' knowledge, Soft-Coated Wheaten Terrier or German Pointer have not previously been suggested at increased risk of PCC diagnosis. The Miniature Schnauzer has previously been reported as predisposed to pituitary adenoma/cortisol-secreting adrenal cancer, and the German Pointer has previously been reported as predisposed for insulinoma and mammary gland cancer but the Soft-Coated Wheaten Terrier has no previously reported predilection for neoplasia [43,45,73]. It is possible that the relative rarity of the Soft-Coated Wheaten Terrier could have prevented previous reporting of a predilection for neoplasia because of underpowering of studies that did not have access to such large denominator populations as the current work. An association was also found between being a terrier breed in general and a diagnosis of PCC, with a similar association also found by Kraai *et al.* (2025) between terrier breed and insulinoma [45]. Terrier breeds constitute one of the twenty-three breed clades that were identified in a large study of canine genomics investigating modern dog breed development and further genetic analysis of these breeds may be warranted to improve our understanding of canine PCC amongst other neoplasia [74].

This study also identified a strong association between sex/neuter status and PCC diagnosis, specifically with male neutered dogs having increased odds of PCC compared to male entire dogs. Interestingly, similar associations between neutering and increased odds of diagnosis of other neoplasia such as osteosarcoma, haemangiosarcoma, and cardiac tumours have previously been reported, although no causation has yet been demonstrated and the retrospective nature of these studies with the potential for selection or confounder biases could lead to an overestimation of the effect of neutering on diagnosis of neoplasia [44,75–78]. Further prospective studies on this topic and research on gonadal hormone influence on the risk of developing neoplasia are warranted. Additionally, neutered dogs tend to be older than their entire counterparts and age was strongly associated with PCC diagnosis, as already reported in previous case series [6]. Dogs aged 9 – <15 years had increased odds for PCC diagnosis and dogs aged 0 – <6 years had decreased odds for PCC diagnosis compared to dogs aged 6 – <9 years which is a typical pattern for a neoplastic condition and also fits the mean age range of ten to twelve years in previous studies and case series [5,6,11]. Age is less likely to be a risk factor specific to PCC and more broadly associated to the diagnosis of a neoplastic disease.

Two associations were found in the final breed-focused model which could have interesting implications in terms of improving the evidence of concurrent endocrine neoplasia (CEN) in veterinary medicine. The current study demonstrated that breeds predisposed for pituitary/cortisol-secreting adrenal cancer as well as breeds predisposed for pituitary/cortisol-secreting adrenal cancer and/or insulinoma had increased odds for PCC diagnosis. This is a finding which is consistent with a previous study of 951 dogs at post-mortem that died or were euthanised at a referral hospital which identified 20 dogs with CEN out of which 7 had PCC and concurrent endocrine neoplasia, with 6/7 having concurrent pituitary adenoma/cortisol-secreting adrenal cancer and 1/7 having concurrent pituitary adenoma and insulinoma [33]. To further support the argument of the existence of a CEN syndrome in dogs with PCC, Barthez *et al.* (1997) also found concurrent pituitary/cortisol-secreting adrenal neoplasia in 13/61 dogs with a PCC diagnosis included in that case series, and more broadly found concurrent neoplasia including a significant proportion of endocrine tumours in 54% of dogs with PCC [6]. Additionally, a case report showed a possible analogy to MEN2 in a Wire-Haired Fox Terrier [79]. However, there is no clear human equivalent for a canine hereditary tumour syndrome where PCC occurs with concurrent pituitary/adrenal tumours or insulinoma. MEN2 and MEN3 are hereditary tumour syndromes which involve up to 24% of human PCC and sPGL, but unlike in dogs the concurrent endocrine neoplasia is usually from the parathyroid or thyroid glands [31,32,80]. More recently, multiple endocrine neoplasia type 4 (MEN4) was discovered in humans which is characterised primarily by parathyroid and pituitary tumours which may occur in association with adrenal, renal and reproductive organ cancer [81,82]. Similarly, a multiple endocrine neoplasia-like syndrome in the rat (MENX) was identified which overlaps MEN1 and MEN2 in humans, with concurrent PCC, pituitary adenomas, parathyroid and thyroid tumours, and is most similar to MEN4 as germline mutations in the tumour suppressor gene *CDKN1B* which codes for the p27 protein is responsible for both MEN4 and MENX [83,84]. It would therefore appear based on current information that if a MEN-like syndrome exists

for canine PCC it would not identically match any of the current MEN types but would overlap all of them, whilst perhaps bearing closest resemblance to MEN4. However, the current study's associations should be interpreted cautiously as it only included PCC diagnoses from the UK whereas the endocrine tumours predisposed breed lists used for this study were not UK-specific and could lack specificity as they relied on prior studies with varying statistical methods.

This study had some limitations. The EHRs were not collected primarily for research purposes and therefore there were issues related to some missing data and also some lack of detail and accuracy in the available clinical records. Some dogs diagnosed with PCC by primary care veterinarians may have been misclassified, potentially representing false positives. Additionally, histopathology on its own does not necessarily provide a definitive diagnosis of PCC if it has not been paired with immunohistochemistry using several markers including chromogranin A, synaptophysin and S1000 that stain chromaffin cells, and without which a different adrenal tumour could be confused for a PCC [2,6,29,85]. Moreover, this study has identified demographic risk factors associated with having PCC rather than risk factors specifically associated with developing this condition. The possibility of a survival bias in the data with cases having been diagnosed with PCC prior to 2019 and surviving up to 2019 may have led to a higher inclusion of cases with a better prognosis and might have consequently missed risk factors associated with more malignant PCC. It is challenging to overcome these limitations in an epidemiological study as PCC is both inherently rare as a diagnosis and challenging to diagnose, particularly in primary care practice. In addition, VetCompass includes only approximately 30% of UK practices which may reduce the ability to generalise to all UK practices, although to mitigate this there is a good geographic distribution of practices of varying sizes and caseloads through the country [86]. Finally, this was an exploratory study meant to support future hypothesis generation and thus did not apply corrections for multiple testing in the various analyses performed, resulting in an increased probability that some of the findings could be statistically significant by chance [87].

In conclusion, this is the first epidemiological study on PCC in the canine population under primary care in veterinary practices in the UK and reported an annual incidence risk of 1 per 100,000 dogs and an annual prevalence of 1 per 100,000 dogs. Several risk factors were identified, in particular: breed, sex/neuter, age, terrier breed, breed predisposed for pituitary adenoma/cortisol-secreting adrenal cancer and breed predisposed for pituitary adenoma/cortisol-secreting adrenal cancer and/or insulinoma. Soft-Coated Wheaten Terrier, German Pointer and Miniature Schnauzer were identified as breeds with ultra-predisposition for PCC diagnosis compared with crossbreeds. These findings can aid veterinarians in primary care practice to improve their recognition of cases with canine PCC and assist future studies on the pathogenesis and genomics of PCC.

## Supporting information

**S1 Fig. Visualising the discriminatory ability of the final breed-focused model using a receiver operating characteristic (ROC) curve.** The area under the ROC curve is 0.867, indicating good discrimination. (TIF)

## Acknowledgments

We thank Noel Kennedy (RVC) for his contributions to the development of VetCompass™ software and programming. We also acknowledge the support of Medivet Veterinary Partnership, Vets4Pets/Companion Care, Goddard Veterinary Group, CVS Group, IVC Evidensia, Linnaeus Group, Beaumont Sainsbury Animal Hospital, Blue Cross, PDSA, Dogs Trust, Vets Now and the other UK practices who collaborate in VetCompass™. We are grateful to The Kennel Club Charitable Trust, Agria Pet Insurance and The Kennel Club for supporting VetCompass.

## Author contributions

**Conceptualization:** Martin Litviakov, Dan G. O'Neill, Floryne O. Buishand.

**Data curation:** Dan G. O'Neill, Dave C. Brodbelt.



**Formal analysis:** Martin Litviakov, Floryne O. Buishand.

**Funding acquisition:** Dan G. O'Neill, Dave C. Brodbelt, Floryne O. Buishand.

**Methodology:** Martin Litviakov, Dan G. O'Neill, Floryne O. Buishand.

**Supervision:** Dan G. O'Neill, Floryne O. Buishand.

**Writing – original draft:** Martin Litviakov, Dan G. O'Neill, Floryne O. Buishand.

**Writing – review & editing:** Martin Litviakov, Dan G. O'Neill, Dave C. Brodbelt, Sara Galac, Floryne O. Buishand.

## References

1. Lenders JWM, Kerstens MN, Amar L, Prejbisz A, Robledo M, Taieb D, et al. Genetics, diagnosis, management and future directions of research of pheochromocytoma and paraganglioma: a position statement and consensus of the Working Group on Endocrine Hypertension of the European Society of Hypertension. *J Hypertens*. 2020;38(8):1443–56. <https://doi.org/10.1097/HJH.0000000000002438> PMID: 32412940
2. Galac S, Korpershoek E. Pheochromocytomas and paragangliomas in humans and dogs. *Vet Comp Oncol*. 2017;15(4):1158–70. <https://doi.org/10.1111/vco.12291> PMID: 28120550
3. Pacak K, Eisenhofer G. An assessment of biochemical tests for the diagnosis of pheochromocytoma. *Nat Clin Pract Endocrinol Metab*. 2007;3(11):744–5. <https://doi.org/10.1038/ncpendmet0615> PMID: 17684481
4. Eisenhofer G, Pacak K, Huynh T-T, Qin N, Bratslavsky G, Linehan WM, et al. Catecholamine metabolomic and secretory phenotypes in pheochromocytoma. *Endocr Relat Cancer*. 2010;18(1):97–111. <https://doi.org/10.1677/ERC-10-0211> PMID: 21051559
5. Gilson SD, Withrow SJ, Wheeler SL, Twedt DC. Pheochromocytoma in 50 dogs. *J Vet Intern Med*. 1994;8(3):228–32. <https://doi.org/10.1111/j.1939-1676.1994.tb03222.x> PMID: 8064661
6. Barthez PY, Marks SL, Woo J, Feldman EC, Matteucci M. Pheochromocytoma in dogs: 61 cases (1984–1995). *J Vet Intern Med*. 1997;11(5):272–8.
7. van den Berg MF. Pheochromocytoma. In: Galac S, Fracassi F, editors. *Canine Endocrinology*. Palm Beach Gardens: Edra Publishing US LLC; 2024. p. 223–38.
8. Lenders JW, Eisenhofer G, Mannelli M, Pacak K. Pheochromocytoma. *Lancet*. 2005;366(9486):665–75.
9. Holt DE, Henthorn P, Howell VM, Robinson BG, Benn DE. Succinate dehydrogenase subunit D and succinate dehydrogenase subunit B mutation analysis in canine pheochromocytoma and paraganglioma. *J Comp Pathol*. 2014;151(1):25–34. <https://doi.org/10.1016/j.jcpa.2014.03.007> PMID: 24813157
10. Korpershoek E, Dieduhsman DAER, Grinwis GCM, Day MJ, Reusch CE, Hilbe M, et al. Molecular Alterations in Dog Pheochromocytomas and Paragangliomas. *Cancers (Basel)*. 2019;11(5):607. <https://doi.org/10.3390/cancers11050607> PMID: 31052272
11. Enright D, Dickerson VM, Grimes JA, Townsend S, Thieman Mankin KM. Short- and long-term survival after adrenalectomy in 53 dogs with pheochromocytomas with or without alpha-blocker therapy. *Vet Surg*. 2022;51(3):438–46. <https://doi.org/10.1111/vsu.13771> PMID: 35141905
12. Maher LJI, Smith EH, Rueter EM, Becker NA, Bida JP, Nelson-Holte M. Mouse models of human familial paraganglioma. In: Martin JF, editor. *Pheochromocytoma - A New View of the Old Problem*. London: InTech. 2011. p. 25–46.
13. Armstrong N, Storey CM, Noll SE, Margulis K, Soe MH, Xu H, et al. SDHB knockout and succinate accumulation are insufficient for tumorigenesis but dual SDHB/NF1 loss yields SDHx-like pheochromocytomas. *Cell Rep*. 2022;38(9):110453. <https://doi.org/10.1016/j.celrep.2022.110453> PMID: 35235785
14. Khanna C, Lindblad-Toh K, Vail D, London C, Bergman P, Barber L, et al. The dog as a cancer model. *Nat Biotechnol*. 2006;24(9):1065–6. <https://doi.org/10.1038/nbt0906-1065b> PMID: 16964204
15. Tischler AS, Favier J. Progress and challenges in experimental models for pheochromocytoma and paraganglioma. *Endocr Relat Cancer*. 2023;30(5):e220405. <https://doi.org/10.1530/ERC-22-0405> PMID: 36810302
16. Ear PH, Marinoni I, Dayton T, Guenter R, Quelle DE, Battistella A. NET Models Meeting 2024 white paper: the current state of neuroendocrine tumour research models and our future aspirations. *Endocrine Oncology*. 2024;4(1):e240055.
17. Andersen GS, Toftdahl DB, Lund JO, Strandgaard S, Nielsen PE. The incidence rate of pheochromocytoma and Conn's syndrome in Denmark, 1977–1981. *J Hum Hypertens*. 1988;2(3):187–9.
18. Stenström G, Svärdsudd K. Pheochromocytoma in Sweden 1958–1981. An analysis of the National Cancer Registry Data. *Acta Med Scand*. 1986;220(3):225–32.
19. Berends AMA, Buitenwerf E, de Krijger RR, Veeger NJGM, van der Horst-Schrivers ANA, Links TP, et al. Incidence of pheochromocytoma and sympathetic paraganglioma in the Netherlands: A nationwide study and systematic review. *Eur J Intern Med*. 2018;51:68–73. <https://doi.org/10.1016/j.ejim.2018.01.015> PMID: 29361475
20. Platts JK, Drew PJ, Harvey JN. Death from pheochromocytoma: lessons from a post-mortem survey. *J R Coll Physicians Lond*. 1995;29(4):299–306. PMID: 7473324



21. Lo CY, Lam KY, Wat MS, Lam KS. Adrenal pheochromocytoma remains a frequently overlooked diagnosis. *Am J Surg*. 2000;179(3):212–5. [https://doi.org/10.1016/s0002-9610\(00\)00296-8](https://doi.org/10.1016/s0002-9610(00)00296-8) PMID: 10827323
22. Cook AK, Spaulding KA, Edwards JF. Clinical findings in dogs with incidental adrenal gland lesions determined by ultrasonography: 151 cases (2007–2010). *J Am Vet Med Assoc*. 2014;244(10):1181–5.
23. Rosenstein DS. Diagnostic imaging in canine pheochromocytoma. *Vet Radiol Ultrasound*. 2000;41(6):499–506. <https://doi.org/10.1111/j.1740-8261.2000.tb01877.x> PMID: 11130788
24. Gostelow R, Bridger N, Syme HM. Plasma-free metanephrine and free normetanephrine measurement for the diagnosis of pheochromocytoma in dogs. *J Vet Intern Med*. 2013;27(1):83–90.
25. van den Berg MF, Kooistra HS, Grinwis GCM, van Nimwegen SA, van Faassen M, Kema IP. Reference intervals for plasma, urinary, and salivary concentrations of free metanephrines in dogs: relevance to the diagnosis of pheochromocytoma. *J Vet Intern Med*. 2023;37(1):173–83.
26. Kook PH, Grest P, Quante S, Boretti FS, Reusch CE. Urinary catecholamine and metadrenaline to creatinine ratios in dogs with a phaeochromocytoma. *Vet Rec*. 2010;166(6):169–74. <https://doi.org/10.1136/vr.b4760> PMID: 20139380
27. Quante S, Boretti FS, Kook PH, Mueller C, Schellenberg S, Zini E, et al. Urinary catecholamine and metanephrine to creatinine ratios in dogs with hyperadrenocorticism or pheochromocytoma, and in healthy dogs. *J Vet Intern Med*. 2010;24(5):1093–7. <https://doi.org/10.1111/j.1939-1676.2010.0578.x> PMID: 20707840
28. Salesov E, Boretti FS, Sieber-Ruckstuhl NS, Rentsch KM, Riond B, Hofmann-Lehmann R, et al. Urinary and plasma catecholamines and metanephrines in dogs with pheochromocytoma, hypercortisolism, nonadrenal disease and in healthy dogs. *J Vet Intern Med*. 2015;29(2):597–602. <https://doi.org/10.1111/jvim.12569> PMID: 25818214
29. Sako T, Kitamura N, Kagawa Y, Hirayama K, Morita M, Kurosawa T, et al. Immunohistochemical evaluation of a malignant pheochromocytoma in a wolfdog. *Vet Pathol*. 2001;38(4):447–50. <https://doi.org/10.1354/vp.38-4-447> PMID: 11467480
30. Kimura N, Takayanagi R, Takizawa N, Itagaki E, Katabami T, Kakoi N. Pathological grading for predicting metastasis in phaeochromocytoma and paraganglioma. *Endocr Relat Cancer*. 2014;21(3):405–14.
31. Amar L, Bertherat J, Baudin E, Ajzenberg C, Bressac-de Paillerets B, Chabre O, et al. Genetic testing in pheochromocytoma or functional paraganglioma. *J Clin Oncol*. 2005;23(34):8812–8. <https://doi.org/10.1200/JCO.2005.03.1484> PMID: 16314641
32. Petri B-J, van Eijck CHJ, de Herder WW, Wagner A, de Krijger RR. Pheochromocytomas and sympathetic paragangliomas. *Br J Surg*. 2009;96(12):1381–92. <https://doi.org/10.1002/bjs.6821> PMID: 19918850
33. Beatrice L, Boretti FS, Sieber-Ruckstuhl NS, Mueller C, Kümmerle-Fraune C, Hilbe M. Concurrent endocrine neoplasias in dogs and cats: a retrospective study (2004–2014). *Vet Rec*. 2018;182(11):323.
34. Capodanno Y, Altieri B, Elders R, Colao A, Faggiano A, Schrader J. Canine insulinoma as a model for human malignant insulinoma research: Novel perspectives for translational clinical studies. *Transl Oncol*. 2022;15(1):101269. <https://doi.org/10.1016/j.tranon.2021.101269> PMID: 34794032
35. Louvet A, Lazard P, Denis B. Phaeochromocytoma treated by en bloc resection including the suprarenal caudal vena cava in a dog. *J Small Anim Pract*. 2005;46(12):591–6. <https://doi.org/10.1111/j.1748-5827.2005.tb00292.x> PMID: 16355735
36. Conzo G, Musella M, Corcione F, De Palma M, Avenia N, Milone M. Laparoscopic treatment of pheochromocytomas smaller or larger than 6 cm. A clinical retrospective study on 44 patients. *Ann Ital Chir*. 2013;84(4):417–22.
37. Zini E, Nolli S, Ferri F, Massari F, Gerardi G, Nicoli S, et al. Pheochromocytoma in Dogs Undergoing Adrenalectomy. *Vet Pathol*. 2019;56(3):358–68. <https://doi.org/10.1177/0300985818819174> PMID: 30595108
38. Recchia A, Digiario S, Colella A, Greco B, Paradies P. Acute onset of hypertensive encephalopathy in a dog with right adrenal pheochromocytoma and neoplastic invasion of the caudal vena cava: Case report and review of the literature. *Open Vet J*. 2024;14(7):1716–25. <https://doi.org/10.5455/OVJ.2024.v14.i7.21> PMID: 39175984
39. Taruscio D, Vittozzi L, Rocchetti A, Torrieri P, Ferrari L. The Occurrence of 275 Rare Diseases and 47 Rare Disease Groups in Italy. Results from the National Registry of Rare Diseases. *Int J Environ Res Public Health*. 2018;15(7):1470. <https://doi.org/10.3390/ijerph15071470> PMID: 30002291
40. Major A, Cox SM, Volchenboum SL. Using big data in pediatric oncology: Current applications and future directions. *Semin Oncol*. 2020;47(1):56–64. <https://doi.org/10.1053/j.seminoncol.2020.02.006> PMID: 32229032
41. Cho SW, Kim JH, Choi HS, Ahn HY, Kim MK, Rhee EJ. Big Data Research in the Field of Endocrine Diseases Using the Korean National Health Information Database. *Endocrinol Metab (Seoul)*. 2023;38(1):10–24. <https://doi.org/10.3803/EnM.2023.102> PMID: 36758542
42. VetCompass [Internet]. VetCompass programme; c2025 [cited 2025 May 20]. Available from: <http://www.rvc.ac.uk/VetCOMPASS/>
43. Varney D, O'Neill D, O'Neill M, Church D, Stell A, Beck S, et al. Epidemiology of mammary tumours in bitches under veterinary care in the UK in 2016. *Vet Rec*. 2023;193(5):e3054. <https://doi.org/10.1002/vetr.3054> PMID: 37231594
44. O'Neill DG, Edmunds GL, Urquhart-Gilmore J, Church DB, Rutherford L, Smalley MJ. Dog breeds and conformations predisposed to osteosarcoma in the UK: a VetCompass study. *Canine Med Genet*. 2023;10(1):8.
45. Kraai K, O'Neill DG, Davison LJ, Brodbelt DC, Galac S, Buishand FO. Incidence and risk factors for insulinoma diagnosed in dogs under primary veterinary care in the UK. *Sci Rep*. 2025;15(1):2463. <https://doi.org/10.1038/s41598-025-86782-6> PMID: 39828734

46. Asher L, Buckland EL, Phylactopoulos CI, Whiting MC, Abeyesinghe SM, Wathes CM. Estimation of the number and demographics of companion dogs in the UK. *BMC Vet Res*. 2011;7:74. <https://doi.org/10.1186/1746-6148-7-74> PMID: 22112367
47. The VeNom Coding Group [Internet]. VeNom Veterinary Nomenclature; c2025 [cited 2025 May 20]. Available from: <http://venomcoding.org/>
48. The Kennel Club [Internet]. Breed Information Centre: Breeds A to Z; c2025 [cited 2025 May 20]. Available from: <https://www.thekennelclub.org.uk/search/breeds-a-to-z>
49. Scott M, Flaherty D, Currall J. Statistics: how many?. *J Small Anim Pract*. 2012;53(7):372–6.
50. Dohoo I, Martin W, Stryhn H. Model-building strategies. In: McPike S, editor. *Veterinary Epidemiologic Research*. Charlottetown: VER Inc. 2012. p. 370–1.
51. Malhotra RK. Errors in the use of Multivariable Logistic Regression Analysis: An Empirical Analysis. *Indian J Community Med*. 2020;45(4):560–2. [https://doi.org/10.4103/ijcm.IJCM\\_16\\_20](https://doi.org/10.4103/ijcm.IJCM_16_20) PMID: 33623224
52. Bursac Z, Gauss CH, Williams DK, Hosmer DW. Purposeful selection of variables in logistic regression. *Source Code Biol Med*. 2008;3:17. <https://doi.org/10.1186/1751-0473-3-17> PMID: 19087314
53. O'Neill DG, Rowe D, Brodbelt DC, Pegram C, Hendricks A. Ironing out the wrinkles and folds in the epidemiology of skin fold dermatitis in dog breeds in the UK. *Sci Rep*. 2022;12(1):10553. <https://doi.org/10.1038/s41598-022-14483-5> PMID: 35794173
54. De Graeff J, Horak BJ. The incidence of pheochromocytoma in the netherlands. *Acta Med Scand*. 1964;176:583–93. <https://doi.org/10.1111/j.0954-6820.1964.tb00661.x> PMID: 14223534
55. McNicol AM. Update on tumours of the adrenal cortex, pheochromocytoma and extra-adrenal paraganglioma. *Histopathology*. 2011;58(2):155–68. <https://doi.org/10.1111/j.1365-2559.2010.03613.x> PMID: 20718871
56. Goldstein RE, O'Neill JA Jr, Holcomb GW 3rd, Morgan WM 3rd, Neblett WW 3rd, Oates JA, et al. Clinical experience over 48 years with pheochromocytoma. *Ann Surg*. 1999;229(6):755–64; discussion 764–6. <https://doi.org/10.1097/00000658-199906000-00001> PMID: 10363888
57. Tischler AS. Pheochromocytoma and extra-adrenal paraganglioma: updates. *Arch Pathol Lab Med*. 2008;132(8):1272–84. <https://doi.org/10.5858/2008-132-1272-PAEPU> PMID: 18684026
58. Mete O, Asa SL, Gill AJ, Kimura N, de Krijger RR, Tischler A. Overview of the 2022 WHO Classification of Paragangliomas and Pheochromocytomas. *Endocr Pathol*. 2022;33(1):90–114.
59. van den Berg MF, Bechmann N, Kooistra HS, van Wolferen ME, Timmermans-Sprang EPM, Peitzsch M, et al. Metabolomic profiling of pheochromocytomas in dogs: Catecholamine phenotype and tricarboxylic acid cycle metabolites. *J Vet Intern Med*. 2024;38(5):2415–24. <https://doi.org/10.1111/jvim.17148> PMID: 39115145
60. Rizzo SA, Newman SJ, Hecht S, Thomas WB. Malignant mediastinal extra-adrenal paraganglioma with spinal cord invasion in a dog. *J Vet Diagn Invest*. 2008;20(3):372–5. <https://doi.org/10.1177/104063870802000322> PMID: 18460631
61. Hardcastle MR, Meyer J, McSporran KD. Pathology in practice. Carotid and aortic body carcinomas (chemodectomas) in a dog. *J Am Vet Med Assoc*. 2013;242(2):175–7. <https://doi.org/10.2460/javma.242.2.175> PMID: 23276092
62. Eisenhofer G, Pacak K, Maher ER, Young WF, de Krijger RR. Pheochromocytoma. *Clin Chem*. 2013;59(3):466–72.
63. Lawrence J, Rohren E, Provenzale J. PET/CT today and tomorrow in veterinary cancer diagnosis and monitoring: fundamentals, early results and future perspectives. *Vet Comp Oncol*. 2010;8(3):163–87. <https://doi.org/10.1111/j.1476-5829.2010.00218.x> PMID: 20691025
64. Randall EK. PET-Computed Tomography in Veterinary Medicine. *Vet Clin North Am Small Anim Pract*. 2016;46(3):515–33, vi. <https://doi.org/10.1016/j.cvs.2015.12.008> PMID: 27068445
65. van Berkel A, Rao JU, Lenders JWM, Pellegata NS, Kusters B, Piscaer I, et al. Semiquantitative 123I-Metaiodobenzylguanidine Scintigraphy to Distinguish Pheochromocytoma and Paraganglioma from Physiologic Adrenal Uptake and Its Correlation with Genotype-Dependent Expression of Catecholamine Transporters. *J Nucl Med*. 2015;56(6):839–46. <https://doi.org/10.2967/jnumed.115.154815> PMID: 25883126
66. Janssen I, Chen CC, Millo CM, Ling A, Taieb D, Lin FI, et al. PET/CT comparing (68)Ga-DOTATATE and other radiopharmaceuticals and in comparison with CT/MRI for the localization of sporadic metastatic pheochromocytoma and paraganglioma. *Eur J Nucl Med Mol Imaging*. 2016;43(10):1784–91. <https://doi.org/10.1007/s00259-016-3357-x> PMID: 26996779
67. Davison AS, Jones DM, Ruthven S, Helliwell T, Shore SL. Clinical evaluation and treatment of pheochromocytoma. *Ann Clin Biochem*. 2018;55(1):34–48. <https://doi.org/10.1177/0004563217739931> PMID: 29027806
68. Nazari MA, Jha A, Kuo MJM, Patel M, Prodanov T, Rosenblum JS, et al. Paediatric pheochromocytoma and paraganglioma: A clinical update. *Clin Endocrinol (Oxf)*. 2024;101(5):446–54. <https://doi.org/10.1111/cen.14955> PMID: 37515400
69. O'Neill DG, Packer RMA, Francis P, Church DB, Brodbelt DC, Pegram C. French Bulldogs differ to other dogs in the UK in propensity for many common disorders: a VetCompass study. *Canine Med Genet*. 2021;8(1):13. <https://doi.org/10.1186/s40575-021-00112-3> PMID: 34911586
70. Kyles AE, Feldman EC, De Cock HE, Kass PH, Mathews KG, Hardie EM. Surgical management of adrenal gland tumors with and without associated tumor thrombi in dogs: 40 cases (1994–2001). *J Am Vet Med Assoc*. 2003;223(5):654–62.
71. Herrera MA, Mehl ML, Kass PH, Pascoe PJ, Feldman EC, Nelson RW. Predictive factors and the effect of phenoxybenzamine on outcome in dogs undergoing adrenalectomy for pheochromocytoma. *J Vet Intern Med*. 2008;22(6):1333–9. <https://doi.org/10.1111/j.1939-1676.2008.0182.x> PMID: 18783351

72. Massari F, Nicoli S, Romanelli G, Buracco P, Zini E. Adrenalectomy in dogs with adrenal gland tumors: 52 cases (2002–2008). *J Am Vet Med Assoc*. 2011;239(2):216–21.
73. Schofield I, Brodbelt DC, Niessen SJM, Church DB, Geddes RF, O'Neill DG. Frequency and risk factors for naturally occurring Cushing's syndrome in dogs attending UK primary-care practices. *J Small Anim Pract*. 2022;63(4):265–74. <https://doi.org/10.1111/jsap.13450> PMID: [34881823](#)
74. Parker HG, Dreger DL, Rimbault M, Davis BW, Mullen AB, Carpintero-Ramirez G, et al. Genomic Analyses Reveal the Influence of Geographic Origin, Migration, and Hybridization on Modern Dog Breed Development. *Cell Rep*. 2017;19(4):697–708. <https://doi.org/10.1016/j.celrep.2017.03.079> PMID: [28445722](#)
75. Ware WA, Hopper DL. Cardiac tumors in dogs: 1982–1995. *J Vet Intern Med*. 1999;13(2):95–103.
76. Kustritz MV. Effects of surgical sterilization on canine and feline health and on society. *Reprod Domest Anim*. 2012;47(Suppl4):214–22.
77. Hart BL, Hart LA, Thigpen AP, Willits NH. Long-term health effects of neutering dogs: comparison of Labrador Retrievers with Golden Retrievers. *PLoS One*. 2014;9(7):e102241. <https://doi.org/10.1371/journal.pone.0102241> PMID: [25020045](#)
78. Smith AN. The role of neutering in cancer development. *Vet Clin North Am Small Anim Pract*. 2014;44(5):965–75. <https://doi.org/10.1016/j.cvs.2014.06.003> PMID: [25174910](#)
79. Peterson ME, Randolph JF, Zaki FA, Heath H 3rd. Multiple endocrine neoplasia in a dog. *J Am Vet Med Assoc*. 1982;180(12):1476–8. <https://doi.org/10.2460/javma.1982.180.12.1476> PMID: [7096188](#)
80. Moline J, Eng C. Multiple endocrine neoplasia type 2: an overview. *Genet Med*. 2011;13(9):755–64.
81. Thakker RV. Multiple endocrine neoplasia type 1 (MEN1) and type 4 (MEN4). *Mol Cell Endocrinol*. 2014;386(1–2):2–15.
82. McDonnell JE, Gild ML, Clifton-Bligh RJ, Robinson BG. Multiple endocrine neoplasia: an update. *Intern Med J*. 2019;49(8):954–61. <https://doi.org/10.1111/imj.14394> PMID: [31387156](#)
83. Pellegata NS, Quintanilla-Martinez L, Siggelkow H, Samson E, Bink K, Höfler H, et al. Germ-line mutations in p27Kip1 cause a multiple endocrine neoplasia syndrome in rats and humans. *Proc Natl Acad Sci U S A*. 2006;103(42):15558–63. <https://doi.org/10.1073/pnas.0603877103> PMID: [17030811](#)
84. Alrezk R, Hannah-Shmouni F, Stratakis CA. MEN4 and CDKN1B mutations: the latest of the MEN syndromes. *Endocr Relat Cancer*. 2017;24(10):T195–208. <https://doi.org/10.1530/ERC-17-0243> PMID: [28824003](#)
85. Fraga M, García-Caballero T, Antúnez J, Couce M, Beiras A, Forteza J. A comparative immunohistochemical study of pheochromocytomas and paragangliomas. *Histol Histopathol*. 1993;8(3):429–36. PMID: [8358154](#)
86. O'Neill DG, Church DB, McGreevy PD, Thomson PC, Brodbelt DC. Approaches to canine health surveillance. *Canine Genet Epidemiol*. 2014;1:2. <https://doi.org/10.1186/2052-6687-1-2> PMID: [26401319](#)
87. Streiner DL, Norman GR. Correction for multiple testing: is there a resolution?. *Chest*. 2011;140(1):16–8. <https://doi.org/10.1378/chest.11-0523> PMID: [21729890](#)
